# Supplementary material for: A Targeted Mass Spectrometry Approach to Identify Peripheral Changes in Metabolic Pathways of Patients with Alzheimer’s Disease
Source: MDPI journal article supplement (doi:10.3390/ijms24119736), 2023-06-04
Supplement: s1 [file s1]

**Supplementary Table 1:** List of the analyzed metabolites (MxP Quant 500 assay by BIOCRATES Life Sciences)

| Type               | Names                                         |                                                      |                                          |                                    |                                       |                                      |
|--------------------|-----------------------------------------------|------------------------------------------------------|------------------------------------------|------------------------------------|---------------------------------------|--------------------------------------|
| Acylcarnitines     | Carnitine                                     | Butenylcarnitine                                     | Hexanoylcarnitine<br>(Fumaryl carnitine) | Decadienoyl-<br>carnitine          | Tetradecadienoyl-<br>carnitine        | Hydroxyhexadeca-<br>dienoylcarnitine |
|                    | Acetylcarnitine                               | Valerylcarnitine                                     | Hexenoylcarnitine                        | Dodecanoyl-<br>carnitine           | Hydroxytetradeca-<br>dienoylcarnitine | Octadecanoyl-<br>carnitine           |
|                    | Propionylcarnitine                            | Glutaryl carnitine<br>(Hydroxyhexanoylcarnitine)     | Pimelylcarnitine                         | Dodecanedioyl-<br>carnitine        | Hexadecanoyl-<br>carnitine            | Octadecenoyl-<br>carnitine           |
|                    | Malonylcarnitine<br>(Hydroxybutyrylcarnitine) | Methylglutaryl-carnitine                             | Octanoylcarnitine                        | Dodecenoyl-<br>carnitine           | Hydroxyhexa-<br>decanoylcarnitine     | Hydroxyoctadec-<br>enoylcarnitine    |
|                    | Hydroxypropionyl-<br>carnitine                | Hydroxyvaleryl-carnitine<br>(Methylmalonylcarnitine) | Nonanoylcarnitine                        | Tetradecanoyl-<br>carnitine        | Hexadecenoyl-<br>carnitine            | Octadecadienoyl-<br>carnitine        |
|                    | Propenylcarnitine                             | Tiglylcarnitine                                      | Decanoylcarnitine                        | Tetradecenoyl-<br>carnitine        | Hydroxyhexadec-<br>enoylcarnitine     |                                      |
|                    | Butyrylcarnitine                              | Glutaconyl-carnitine                                 | Decenoylcarnitine                        | Hydroxytetradec-<br>enoylcarnitine | Hexadecadienoyl-<br>carnitine         |                                      |
| Alkaloids          | Trigonelline                                  |                                                      |                                          |                                    |                                       |                                      |
| Amine Oxides       | Trimethylamine N-oxide                        |                                                      |                                          |                                    |                                       |                                      |
| Amino Acid Related | 1-Methylhistidine                             | Asymmetric dimethylarginine                          | cis-4-<br>Hydroxyproline                 | Dihydroxy-<br>phenylalanine        | Nitrotyrosine                         | Sarcosine                            |
|                    | 3-Methylhistidine                             | alpha-Aminoadipic acid                               | Carnosine                                | Homoarginine                       | Ornithine                             | Symmetric<br>dimethylarginine        |
|                    | 5-Aminovaleric acid                           | L-Anserine                                           | Citrulline                               | Homocysteine                       | Phenylacetyl-<br>glycine              | trans-4-<br>Hydroxyproline           |

|                           |                          |                             |                               |                             |                       |                    |
|---------------------------|--------------------------|-----------------------------|-------------------------------|-----------------------------|-----------------------|--------------------|
|                           | alpha-Amino-butyric acid | beta-Aminobutyric acid      | Creatinine                    | Kynurenine                  | Phenylalanine betaine | Taurine            |
|                           | Acetylmethionine         | Betaine                     | Cystine                       | Methionine-Sulfoxide        | Proline betaine       | Tryptophan betaine |
| Amino Acid                | Alanine                  | Cysteine                    | Histidine                     | Methionine                  | Threonine             |                    |
|                           | Arginine                 | Glutamine                   | Isoleucine                    | Phenylalanine               | Tryptophan            |                    |
|                           | Asparagine               | Glutamic Acid               | Leucine                       | Proline                     | Tyrosine              |                    |
|                           | Aspartic Acid            | Glycine                     | Lysine                        | Serine                      | Valine                |                    |
| Bile Acids                | Cholic Acid              | Glycocholic acid            | Glycolithocholic acid         | Taurocholic acid            | Taurolithocholic acid |                    |
|                           | Chenodeoxycholic acid    | Glycochenodeoxy-cholic acid | Glycolithocholic acid sulfate | Taurochenodeoxy-cholic acid | Tauromuricholic acids |                    |
|                           | Deoxycholic acid         | Glycodeoxycholic acid       | Glycoursodeoxy-cholic acid    | Taurodeoxycholic acid       |                       |                    |
| Biogenic Amines           | beta-Alanine             | gamma-Amino-butyric acid    | Phenylethylamine              | Serotonin                   | Spermine              |                    |
|                           | Dopamine                 | Histamine                   | Putrescine                    | Spermidine                  |                       |                    |
| Carbohydrates and Related | Hexose                   |                             |                               |                             |                       |                    |
| Carboxylic Acids          | Aconitic acid            | Tetradecanedioic acid       | Lactic acid                   | Succinic acid               |                       |                    |
|                           | Dodecanedioic acid       | Hippuric acid               | Hydroxyglutaric acid          |                             |                       |                    |
| Ceramides                 | (d16:1/18:0)             | (d18:1/14:0)                | (d18:1/20:0(OH))              | (d18:1/24:1)                | (d18:2/16:0)          | (d18:2/23:0)       |
|                           | (d16:1/20:0)             | (d18:1/16:0)                | (d18:1/20:0)                  | (d18:1/25:0)                | (d18:2/18:0)          | (d18:2/24:0)       |
|                           | (d16:1/22:0)             | (d18:1/18:0(OH))            | (d18:1/22:0)                  | (d18:1/26:0)                | (d18:2/18:1)          | (d18:2/24:1)       |
|                           | (d16:1/23:0)             | (d18:1/18:0)                | (d18:1/23:0)                  | (d18:1/26:1)                | (d18:2/20:0)          |                    |

|                     |                      |                       |               |                   |                  |                     |
|---------------------|----------------------|-----------------------|---------------|-------------------|------------------|---------------------|
|                     | (d16:1/24:0)         | (d18:1/18:1)          | (d18:1/24:0)  | (d18:2/14:0)      | (d18:2/22:0)     |                     |
| Cholesteryl Esters  | 14:0                 | 16:0                  | 18:0          | 20:0              | 20:5             | 22:5                |
|                     | 14:1                 | 16:1                  | 18:1          | 20:1              | 22:0             | 22:6                |
|                     | 15:0                 | 17:0                  | 18:2          | 20:3              | 22:1             |                     |
|                     | 15:1                 | 17:1                  | 18:3          | 20:4              | 22:2             |                     |
| Cresols             | p-Cresol sulfate     |                       |               |                   |                  |                     |
| Diacylglyceride     | (14:0_14:0)          | (16:0_18:1)           | (16:1_20:0)   | (18:1_18:4)       | (18:2_18:2)      | (22:1_22:2)         |
|                     | (14:0_18:1)          | (16:0_18:2)           | (17:0_17:1)   | (18:1_20:0)       | (18:2_18:3)      | O-(14:0_18:2)       |
|                     | (14:0_18:2)          | (16:0_20:0)           | (17:0_18:1)   | (18:1_20:1)       | (18:2_18:4)      | O-(16:0_18:1)       |
|                     | (14:0_20:0)          | (16:0_20:3)           | (18:0_20:0)   | (18:1_20:2)       | (18:2_20:0)      | O-(16:0_20:4)       |
|                     | (14:1_18:1)          | (16:0_20:4)           | (18:0_20:4)   | (18:1_20:3)       | (18:2_20:4)      |                     |
|                     | (14:1_20:2)          | (16:1_18:0)           | (18:1_18:1)   | (18:1_20:4)       | (18:3_18:3)      |                     |
|                     | (16:0_16:0)          | (16:1_18:1)           | (18:1_18:2)   | (18:1_22:5)       | (18:3_20:2)      |                     |
|                     | (16:0_16:1)          | (16:1_18:2)           | (18:1_18:3)   | (18:1_22:6)       | (21:0_22:6)      |                     |
| Dihexosyl ceramides | (d18:1/14:0)         | (d18:1/20:0)          | (d18:1/24:1)  | (18:0/18:0(OH))   | (18:0/22:0)      | (18:0/26:1(OH))     |
|                     | (d18:1/16:0)         | (d18:1/22:0)          | (d18:1/26:0)  | (18:0/18:0)       | (18:0/24:0)      | (18:0/26:1)         |
|                     | (d18:1/18:0)         | (d18:1/24:0)          | (d18:1/26:1)  | (18:0/20:0)       | (18:0/24:1)      |                     |
| Fatty Acids         | Arachidonic acid     | Eicosapentaenoic acid | Myristic acid | Stearic acid      | Octadecadienoate | Eicosadienoic acid  |
|                     | Docosahexaenoic acid | Dodecanoic acid       | Palmitic acid | Octadecenoic acid | Eicosenoic acid  | Eicosatrienoic acid |
| Hexosyl ceramide    | (d16:1/22:0)         | (d18:1/18:0)          | (d18:1/23:0)  | (d18:1/26:1)      | (d18:2/22:0)     |                     |
|                     | (d16:1/24:0)         | (d18:1/18:1)          | (d18:1/24:0)  | (d18:2/16:0)      | (d18:2/23:0)     |                     |

|                          |                             |                             |                     |                                |                     |          |
|--------------------------|-----------------------------|-----------------------------|---------------------|--------------------------------|---------------------|----------|
|                          | (d18:1/14:0)                | (d18:1/20:0)                | (d18:1/24:1)        | (d18:2/18:0)                   | (d18:2/24:0)        |          |
|                          | (d18:1/16:0)                | (d18:1/22:0)                | (d18:1/26:0)        | (d18:2/20:0)                   |                     |          |
| Hormones and Related     | Absciscic acid              | Cortisol                    | Cortisone           | Dehydroepiandrosterone sulfate |                     |          |
| Indoles and Derivatives  | Indoleacetic acid           | Indolepropionic acid        | Indoxyl sulfate     | Indole                         |                     |          |
| Lysophosphatidylcholines | C14:0                       | C17:0                       | C18:2               | C24:0                          | C28:0               |          |
|                          | C16:0                       | C18:0                       | C20:3               | C26:0                          | C28:1               |          |
|                          | C16:1                       | C18:1                       | C20:4               | C26:1                          |                     |          |
| Nucleobases and Related  | Hypoxanthine                | Xanthine                    |                     |                                |                     |          |
| Phosphatidylcholines     | aa C24:0                    | aa C36:0                    | aa C40:1            | ae C30:1                       | ae C36:5            | ae C40:6 |
|                          | aa C26:0                    | aa C36:1                    | aa C40:2            | ae C30:2                       | ae C38:0            | ae C42:0 |
|                          | aa C28:1                    | aa C36:2                    | aa C40:3            | ae C32:1                       | ae C38:1            | ae C42:1 |
|                          | aa C30:0                    | aa C36:3                    | aa C40:4            | ae C32:2                       | ae C38:2            | ae C42:2 |
|                          | aa C30:2                    | aa C36:4                    | aa C40:5            | ae C34:0                       | ae C38:3            | ae C42:3 |
|                          | aa C32:0                    | aa C36:5                    | aa C40:6            | ae C34:1                       | ae C38:4            | ae C42:4 |
|                          | aa C32:1                    | aa C36:6                    | aa C42:0            | ae C34:2                       | ae C38:5            | ae C42:5 |
|                          | aa C32:2                    | aa C38:0                    | aa C42:1            | ae C34:3                       | ae C38:6            | ae C44:3 |
|                          | aa C32:3                    | aa C38:1                    | aa C42:2            | ae C36:0                       | ae C40:1            | ae C44:4 |
|                          | aa C34:1                    | aa C38:3                    | aa C42:4            | ae C36:1                       | ae C40:2            | ae C44:5 |
|                          | aa C34:2                    | aa C38:4                    | aa C42:5            | ae C36:2                       | ae C40:3            | ae C44:6 |
|                          | aa C34:3                    | aa C38:5                    | aa C42:6            | ae C36:3                       | ae C40:4            |          |
|                          | aa C34:4                    | aa C38:6                    | ae C30:0            | ae C36:4                       | ae C40:5            |          |
| Sphingomyelins           | Hydroxysphingo-myelin C14:1 | Hydroxysphingo-myelin C22:2 | Sphingomyelin C16:1 | Sphingomyelin C20:2            | Sphingomyelin C24:1 |          |
|                          | Hydroxysphingo-myelin C16:1 | Hydroxysphingo-myelin C24:1 | Sphingomyelin C18:0 | Sphingomyelin C22:3            | Sphingomyelin C26:0 |          |

|                  | Hydroxysphingo-myelin<br>C22:1 | Sphingomyelin C16:0 | Sphingomyelin<br>C18:1 | Sphingomyelin<br>C24:0 | Sphingomyelin<br>C26:1 |             |
|------------------|--------------------------------|---------------------|------------------------|------------------------|------------------------|-------------|
| Triacylglyceride | (14:0_32:2)                    | (16:0_38:5)         | (17:2_34:3)            | (18:1_36:0)            | (18:3_34:0)            | (20:3_36:5) |
|                  | (14:0_34:0)                    | (16:0_38:6)         | (17:2_36:2)            | (18:1_36:1)            | (18:3_34:1)            | (20:4_30:0) |
|                  | (14:0_34:1)                    | (16:0_38:7)         | (17:2_36:3)            | (18:1_36:2)            | (18:3_34:2)            | (20:4_32:0) |
|                  | (14:0_34:2)                    | (16:0_40:6)         | (17:2_36:4)            | (18:1_36:3)            | (18:3_34:3)            | (20:4_32:1) |
|                  | (14:0_34:3)                    | (16:0_40:7)         | (17:2_38:5)            | (18:1_36:4)            | (18:3_35:2)            | (20:4_32:2) |
|                  | (14:0_35:1)                    | (16:0_40:8)         | (17:2_38:6)            | (18:1_36:5)            | (18:3_36:1)            | (20:4_33:2) |
|                  | (14:0_35:2)                    | (16:1_28:0)         | (17:2_38:7)            | (18:1_36:6)            | (18:3_36:2)            | (20:4_34:0) |
|                  | (14:0_36:1)                    | (16:1_30:1)         | (18:0_30:0)            | (18:1_38:5)            | (18:3_36:3)            | (20:4_34:1) |
|                  | (14:0_36:2)                    | (16:1_32:0)         | (18:0_30:1)            | (18:1_38:6)            | (18:3_36:4)            | (20:4_34:2) |
|                  | (14:0_36:3)                    | (16:1_32:1)         | (18:0_32:0)            | (18:1_38:7)            | (18:3_38:5)            | (20:4_34:3) |
|                  | (14:0_36:4)                    | (16:1_32:2)         | (18:0_32:1)            | (18:2_28:0)            | (18:3_38:6)            | (20:4_35:3) |
|                  | (14:0_38:4)                    | (16:1_33:1)         | (18:0_32:2)            | (18:2_30:0)            | (20:0_32:3)            | (20:4_36:2) |
|                  | (14:0_38:5)                    | (16:1_34:0)         | (18:0_34:2)            | (18:2_30:1)            | (20:0_32:4)            | (20:4_36:3) |
|                  | (14:0_39:3)                    | (16:1_34:1)         | (18:0_34:3)            | (18:2_31:0)            | (20:0_34:1)            | (20:4_36:4) |
|                  | (16:0_28:1)                    | (16:1_34:2)         | (18:0_36:1)            | (18:2_32:0)            | (20:1_24:3)            | (20:4_36:5) |
|                  | (16:0_28:2)                    | (16:1_34:3)         | (18:0_36:2)            | (18:2_32:1)            | (20:1_26:1)            | (20:5_34:0) |
|                  | (16:0_30:2)                    | (16:1_36:1)         | (18:0_36:3)            | (18:2_32:2)            | (20:1_30:1)            | (20:5_34:1) |
|                  | (16:0_32:0)                    | (16:1_36:2)         | (18:0_36:4)            | (18:2_33:0)            | (20:1_31:0)            | (20:5_34:2) |
|                  | (16:0_32:1)                    | (16:1_36:3)         | (18:0_36:5)            | (18:2_33:1)            | (20:1_32:1)            | (20:5_36:2) |
|                  | (16:0_32:2)                    | (16:1_36:4)         | (18:0_38:6)            | (18:2_33:2)            | (20:1_32:2)            | (20:5_36:3) |
|                  | (16:0_32:3)                    | (16:1_36:5)         | (18:0_38:7)            | (18:2_34:0)            | (20:1_32:3)            | (22:0_32:4) |
|                  | (16:0_33:1)                    | (16:1_38:3)         | (18:1_26:0)            | (18:2_34:1)            | (20:1_34:0)            | (22:1_32:5) |
|                  | (16:0_33:2)                    | (16:1_38:4)         | (18:1_28:1)            | (18:2_34:2)            | (20:1_34:1)            | (22:2_32:4) |
|                  | (16:0_34:0)                    | (16:1_38:5)         | (18:1_30:0)            | (18:2_34:3)            | (20:1_34:2)            | (22:3_30:2) |
|                  | (16:0_34:1)                    | (17:0_32:1)         | (18:1_30:1)            | (18:2_34:4)            | (20:1_34:3)            | (22:4_32:0) |
|                  | (16:0_34:2)                    | (17:0_34:1)         | (18:1_30:2)            | (18:2_35:1)            | (20:2_32:0)            | (22:4_32:2) |
|                  | (16:0_34:3)                    | (17:0_34:2)         | (18:1_31:0)            | (18:2_35:2)            | (20:2_32:1)            | (22:4_34:2) |
|                  | (16:0_34:4)                    | (17:0_34:3)         | (18:1_32:0)            | (18:2_35:3)            | (20:2_34:1)            | (22:5_32:0) |
|                  | (16:0_35:1)                    | (17:0_36:3)         | (18:1_32:1)            | (18:2_36:0)            | (20:2_34:2)            | (22:5_32:1) |
|                  | (16:0_35:2)                    | (17:0_36:4)         | (18:1_32:2)            | (18:2_36:1)            | (20:2_34:3)            | (22:5_34:1) |

|                        |              |              |              |              |              |              |
|------------------------|--------------|--------------|--------------|--------------|--------------|--------------|
|                        | (16:0_35:3)  | (17:1_32:1)  | (18:1_32:3)  | (18:2_36:2)  | (20:2_34:4)  | (22:5_34:2)  |
|                        | (16:0_36:2)  | (17:1_34:1)  | (18:1_33:0)  | (18:2_36:3)  | (20:2_36:5)  | (22:5_34:3)  |
|                        | (16:0_36:3)  | (17:1_34:2)  | (18:1_33:1)  | (18:2_36:4)  | (20:3_32:0)  | (22:6_32:0)  |
|                        | (16:0_36:4)  | (17:1_34:3)  | (18:1_33:2)  | (18:2_36:5)  | (20:3_32:1)  | (22:6_32:1)  |
|                        | (16:0_36:5)  | (17:1_36:3)  | (18:1_33:3)  | (18:2_38:4)  | (20:3_32:2)  | (22:6_34:1)  |
|                        | (16:0_36:6)  | (17:1_36:4)  | (18:1_34:1)  | (18:2_38:5)  | (20:3_34:0)  | (22:6_34:2)  |
|                        | (16:0_37:3)  | (17:1_36:5)  | (18:1_34:2)  | (18:2_38:6)  | (20:3_34:1)  | (22:6_34:3)  |
|                        | (16:0_38:1)  | (17:1_38:5)  | (18:1_34:3)  | (18:3_30:0)  | (20:3_34:2)  |              |
|                        | (16:0_38:2)  | (17:1_38:6)  | (18:1_34:4)  | (18:3_32:0)  | (20:3_34:3)  |              |
|                        | (16:0_38:3)  | (17:1_38:7)  | (18:1_35:2)  | (18:3_32:1)  | (20:3_36:3)  |              |
|                        | (16:0_38:4)  | (17:2_34:2)  | (18:1_35:3)  | (18:3_33:2)  | (20:3_36:4)  |              |
| Trihexosylceramides    | (d18:1/16:0) | (d18:1/18:0) | (d18:1/24:1) | (d18:1/26:1) | (d18:1/20:0) | (d18:1/22:0) |
| Vitamins and Cofactors | Choline      |              |              |              |              |              |

**Supplementary Table 2.** The table reports mean, standard deviation, standard error, 95% confidence interval (CI), and range values (minimum and maximum values) of the downregulated or upregulated metabolites for comparison between patients with AD and controls.

|                 | Compound                       | Mean    | Standard Deviation | Standard Error | 95% CI of the Mean |             | Minimum | Maximum  |
|-----------------|--------------------------------|---------|--------------------|----------------|--------------------|-------------|---------|----------|
|                 |                                |         |                    |                | Upper Limit        | Lower Limit |         |          |
| <b>Controls</b> | L-Carnitine                    | 38.057  | 6.589              | 1.473          | 34.973             | 41.140      | 26.440  | 48.750   |
|                 | Homo-L-arginine                | 2.389   | 0.997              | 0.223          | 1.922              | 2.856       | 1.220   | 4.930    |
|                 | L-Aspartic acid                | 10.417  | 3.289              | 0.735          | 8.877              | 11.956      | 6.680   | 21.200   |
|                 | L-Glutamic acid                | 115.233 | 82.584             | 18.466         | 76.583             | 153.883     | 56.400  | 452.000  |
|                 | L-2-Hydroxyglutaric acid       | 7.250   | 1.337              | 0.299          | 6.624              | 7.875       | 5.350   | 10.400   |
|                 | Ceramide (d18:1/24:1)          | 1.128   | 0.245              | 0.055          | 1.013              | 1.242       | 0.730   | 1.810    |
|                 | CE (18:2(9Z,12Z))              | 785.494 | 229.788            | 51.382         | 677.950            | 893.038     | 399.950 | 1306.000 |
|                 | Ocatadecadienoate              | 28.983  | 18.095             | 4.046          | 20.514             | 37.451      | 9.670   | 97.360   |
|                 | Lysophosphatidyl-choline C14:1 | 7.417   | 1.962              | 0.439          | 6.498              | 8.335       | 4.020   | 12.170   |
|                 | Phosphatidyl-choline aa C28:1  | 3.045   | 0.566              | 0.127          | 2.779              | 3.310       | 1.910   | 3.750    |
|                 | Hydroxysphingo-myelin C22:2    | 7.343   | 2.151              | 0.481          | 6.336              | 8.349       | 3.870   | 10.800   |
|                 | Hydroxysphingo-myelin C22:1    | 0.852   | 0.321              | 0.072          | 0.702              | 1.002       | 0.410   | 1.440    |
|                 | Hydroxysphingo-myelin C24:2    | 12.836  | 3.998              | 0.894          | 10.965             | 14.706      | 5.420   | 19.400   |
|                 | SM (d18:1/24:0)                | 0.146   | 0.021              | 0.005          | 0.136              | 0.155       | 0.120   | 0.180    |
|                 | Gamma-Aminobutyric acid        | 0.473   | 0.166              | 0.037          | 0.395              | 0.550       | 0.240   | 0.830    |
|                 | PC aa C40:3                    | 0.096   | 0.033              | 0.007          | 0.080              | 0.112       | 0.050   | 0.170    |
|                 | Phosphatidyl-choline aa C28:1  | 0.096   | 0.033              | 0.007          | 0.080              | 0.112       | 0.050   | 0.170    |

|    |                                |         |         |        |         |         |         |          |
|----|--------------------------------|---------|---------|--------|---------|---------|---------|----------|
| AD | L-Carnitine                    | 35.592  | 8.580   | 1.918  | 31.577  | 39.607  | 17.200  | 49.840   |
|    | Homo-L-arginine                | 1.999   | 0.994   | 0.222  | 1.533   | 2.464   | 0.640   | 4.770    |
|    | L-Aspartic acid                | 9.434   | 2.176   | 0.487  | 8.415   | 10.452  | 6.220   | 14.300   |
|    | L-Glutamic acid                | 79.672  | 19.817  | 4.431  | 70.397  | 88.946  | 50.140  | 122.000  |
|    | L-2-Hydroxyglutaric acid       | 7.230   | 1.512   | 0.338  | 6.522   | 7.938   | 5.120   | 10.100   |
|    | Ceramide (d18:1/24:1)          | 1.494   | 0.355   | 0.079  | 1.327   | 1.660   | 0.950   | 2.190    |
|    | CE (18:2(9Z,12Z))              | 726.256 | 180.703 | 40.406 | 641.684 | 810.828 | 387.000 | 1041.000 |
|    | Ocatadecadienoate              | 22.015  | 11.061  | 2.473  | 16.838  | 27.192  | 0.000   | 39.900   |
|    | Lysophosphatidyl-choline C14:1 | 6.883   | 2.271   | 0.508  | 5.820   | 7.945   | 3.520   | 11.600   |
|    | Phosphatidyl-choline aa C28:1  | 3.071   | 0.682   | 0.153  | 2.751   | 3.390   | 1.680   | 4.350    |
|    | Hydroxysphingo-myelin C22:2    | 6.769   | 1.534   | 0.343  | 6.051   | 7.487   | 4.250   | 9.650    |
|    | Hydroxysphingo-myelin C22:1    | 0.720   | 0.155   | 0.035  | 0.647   | 0.793   | 0.460   | 1.150    |
|    | Hydroxysphingo-myelin C24:2    | 11.985  | 2.833   | 0.634  | 10.659  | 13.311  | 7.090   | 18.400   |
|    | SM (d18:1/24:0)                | 0.135   | 0.027   | 0.006  | 0.123   | 0.147   | 0.080   | 0.190    |
|    | Gamma-Aminobutyric acid        | 0.670   | 0.295   | 0.066  | 0.532   | 0.808   | 0.320   | 1.310    |
|    | PC aa C40:3                    | 0.082   | 0.027   | 0.006  | 0.069   | 0.094   | 0.030   | 0.140    |
|    | Phosphatidyl-choline aa C28:1  | 0.082   | 0.027   | 0.006  | 0.069   | 0.094   | 0.030   | 0.140    |



**Supplementary Table 3.** Pearson's correlation matrix of downregulated or upregulated metabolites in subjects with AD.

|                               | L-Carnitine | Homo-L-arginine | L-Aspartic acid | L-Glutamic acid | L-2-Hydroxyglutaric acid | Ceramide (d18:1/24:1) | CE (18:2(9Z,12Z)) | Ocatadecadienoate | Lysophosphatidylcholine C14:1 | Phosphatidylcholine aa C28:1 | Hydroxyphosphingomyelin C22:2 | Hydroxyphosphingomyelin C24:2 | SM (d18:1/24:0) | Gamma-Aminobutyric acid | PC aa C40:3 | Phosphatidylcholine aa C28:1 |
|-------------------------------|-------------|-----------------|-----------------|-----------------|--------------------------|-----------------------|-------------------|-------------------|-------------------------------|------------------------------|-------------------------------|-------------------------------|-----------------|-------------------------|-------------|------------------------------|
| L-Carnitine                   | 1.00        | -0.23           | 0.30            | -0.03           | -0.04                    | 0.32                  | -0.15             | 0.20              | -0.25                         | -0.24                        | 0.17                          | 0.06                          | -0.07           | 0.14                    | -0.16       | 0.26                         |
| Homo-L-arginine               |             | 1.00            | .498*           | 0.22            | .451*                    | 0.01                  | 0.23              | -0.03             | 0.00                          | -0.05                        | 0.00                          | 0.38                          | 0.29            | 0.33                    | 0.04        | 0.24                         |
| L-Aspartic acid               |             |                 | 1.00            | .462*           | .592**                   | .489*                 | 0.33              | 0.31              | 0.31                          | 0.16                         | 0.15                          | 0.30                          | .461*           | .490*                   | 0.24        | 0.27                         |
| L-Glutamic acid               |             |                 |                 | 1.00            | .520*                    | 0.22                  | 0.15              | 0.07              | 0.19                          | 0.20                         | 0.15                          | 0.09                          | 0.20            | 0.33                    | .463*       | -0.36                        |
| L-2-Hydroxyglutaric acid      |             |                 |                 |                 | 1.00                     | .568**                | .676**            | 0.16              | 0.21                          | .526*                        | 0.43                          | .466*                         | .690**          | 0.37                    | .581**      | -0.24                        |
| Ceramide (d18:1/24:1)         |             |                 |                 |                 |                          | 1.00                  | 0.43              | 0.27              | 0.23                          | 0.29                         | 0.37                          | 0.32                          | .533*           | 0.35                    | 0.35        | -0.01                        |
| CE (18:2(9Z,12Z))             |             |                 |                 |                 |                          |                       | 1.00              | 0.14              | 0.42                          | .706**                       | .711**                        | .584**                        | .813**          | 0.06                    | 0.15        | 0.14                         |
| Ocatadecadienoate             |             |                 |                 |                 |                          |                       |                   | 1.00              | 0.02                          | -0.10                        | -0.15                         | 0.01                          | 0.02            | 0.44                    | -0.04       | 0.12                         |
| Lysophosphatidylcholine C14:1 |             |                 |                 |                 |                          |                       |                   |                   | 1.00                          | .718**                       | 0.34                          | 0.27                          | .567**          | -0.01                   | 0.26        | 0.22                         |
| Phosphatidylcholine aa C28:1  |             |                 |                 |                 |                          |                       |                   |                   |                               | 1.00                         | .631**                        | 0.43                          | .758**          | -0.02                   | 0.42        | -0.07                        |
| Hydroxyphosphingomyelin C22:2 |             |                 |                 |                 |                          |                       |                   |                   |                               |                              | 1.00                          | .551*                         | .710**          | -0.18                   | 0.07        | 0.15                         |
| Hydroxyphosphingomyelin C24:2 |             |                 |                 |                 |                          |                       |                   |                   |                               |                              |                               | 1.00                          | .730**          | -0.01                   | -0.13       | .496*                        |

|                                          |  |  |  |  |  |  |  |  |  |  |  |  |      |       |      |                 |         |
|------------------------------------------|--|--|--|--|--|--|--|--|--|--|--|--|------|-------|------|-----------------|---------|
| myelin<br>C22:1                          |  |  |  |  |  |  |  |  |  |  |  |  |      |       |      |                 |         |
| Hydroxys<br>phingo-<br>myelin<br>C24:2   |  |  |  |  |  |  |  |  |  |  |  |  | 1.00 | -0.05 | 0.28 | 0.2<br>0        | 0.20    |
| SM<br>(d18:1/24:<br>0)                   |  |  |  |  |  |  |  |  |  |  |  |  |      | 1.00  | 0.13 | -<br>0.0<br>3   | -0.03   |
| Gamma-<br>Aminobut<br>yric acid          |  |  |  |  |  |  |  |  |  |  |  |  |      |       | 1.00 | -<br>.67<br>5** | -.675** |
| PC aa<br>C40:3                           |  |  |  |  |  |  |  |  |  |  |  |  |      |       |      | 1.0<br>0        | 1.000** |
| Phosphati<br>dyl-<br>choline aa<br>C28:1 |  |  |  |  |  |  |  |  |  |  |  |  |      |       |      |                 | 1.00    |

\*Significant correlation  $P < 0.05$ .

\*\*Significant correlation  $P < 0.01$ .
